# Supplementary material
Source: publisher figshare collection journal article supplement (https://acs.figshare.com/ndownloader/files/5871684)

## I. Experimental

**General Methods.** All reactions, except where indicated, were carried out in flame-dried glassware under a dry, oxygen-free argon atmosphere using standard Schlenk and drybox techniques. All solvents were either freshly distilled from sodium benzophenone (or  $P_2O_5$  in the case of  $CH_2Cl_2$ ) or deoxygenated then dried by passing them through a column of activated alumina under nitrogen<sup>1</sup>.  $CD_2Cl_2$  was purchased from Cambridge Isotope Laboratories, Inc. and dried over  $CaH_2$  or  $P_4O_{10}$ . The  $CD_2Cl_2$  was subjected to three freeze-pump-thaw cycles and vacuum transferred into glass Schlenk tubes fitted with high-vacuum Teflon plugs, and then stored under Ar.  $CDCl_3$  was prepared by literature procedure.<sup>2</sup> Air sensitive complexes were handled in an argon filled glove box and stored under argon at  $-30\text{ }^\circ\text{C}$ . CP grade CO and  $C_2H_4$  were purchased from National Welders Supply and used as received.  $^{13}CO$  (99%  $^{13}C$ ) and  $^{13}CH_2^{13}CH_2$  (99%  $^{13}C$ ) were purchased from Cambridge Isotope Laboratories, Inc. and used as received. Trimethylaluminum (2.0 M in toluene), 1,3-bis-(diphenylphosphino)propane and  $Ni(acac)_2$  were purchased from Aldrich Chemicals and used as received. Elemental analyses were obtained from Atlantic Microlabs Inc., Norcross GA.

$H(OEt)_2BAR'_4$ ,<sup>3</sup> and  $CDCl_2F$ <sup>2</sup> were synthesized using published methods.

**Analytical Measurements.** FT-IR experiments were recorded using a ReactIR 1000 from ASI Applied Systems fitted with a silicon-tipped (SiComp) probe inserted through a nylon adapter and O-ring seal into a 2-necked flask.

The  $^1H$  and  $^{13}C$  NMR data attributed to the counterion  $BAR'_4$  ( $Ar' = 3,5-(CF_3)_2C_6H_3$ ) are consistent for all cationic complexes examined and are not included in

each compound characterized below. Full spectral details have been previously reported.<sup>4</sup>

**Kinetic Measurements.** Kinetics experiments were carried out under argon in NMR tubes equipped with septa.  $\text{CDCl}_2\text{F}$  was added to samples at  $-78\text{ }^\circ\text{C}$  unless otherwise indicated, after which solids were dissolved at the lowest temperature possible. Kinetics experiments were carried out on a Bruker Avance 300 spectrometer. NMR probe temperatures were measured using a thermocouple.<sup>5</sup>

**(dppp)NiMe<sub>2</sub>, 1.**  $\text{Ni}(\text{acac})_2$  (2.64 g, 0.103 mmol) and 1,3-bis-(diphenylphosphino)propane (4.24 g, 0.103 mmol) were combined in a schlenk flask under argon atmosphere and slurried in  $\text{Et}_2\text{O}$  (60 mL) at  $25\text{ }^\circ\text{C}$  for 1 h. The slurry became a light blue color. The slurry was cooled to  $-50\text{ }^\circ\text{C}$  and 4.75 mL (2.0 M in toluene, 0.029 mmol based on Me) of  $\text{AlMe}_3$  was added dropwise via syringe. The solution was allowed to warm slowly to  $25\text{ }^\circ\text{C}$  and stir overnight. A yellow-brown slurry formed that upon filtration gave a canary-yellow solid. The solid was washed with  $\text{Et}_2\text{O}$  (3 x 20 mL) and dried in vacuo to yield 3.16 g (61 %) of **1**. The NMR spectra were consistent with that previously reported.<sup>6</sup>

#### **In Situ Preparation of Cationic Nickel Complexes for IR Studies.**

The standard procedure utilized for the generation of complex **2** for the purpose of characterizing CO derivatives by IR spectroscopy is as follows:  $\text{dpppNi}(\text{CH}_3)_2$  (15.0 mg, 0.030 mmol) and  $\text{H}(\text{OEt}_2)_2\text{BAr}'_4$  (30.0 mg, 0.030 mmol) were combined in a Schlenk tube fitted with a septum and cooled to  $-80\text{ }^\circ\text{C}$ .  $\text{CH}_2\text{Cl}_2$  (2 mL) was added via syringe and the solution was stirred until homogeneous. This solution was then transferred via cannula to the two-necked IR flask cooled to  $-80\text{ }^\circ\text{C}$ . This solution of **2** was used to

generate complexes **4**, **5** and **6** by the same procedure as that described below for the NMR reactions. For complex **5** the temperature at which CO was introduced was -80 °C.

### In Situ Preparation of Cationic Nickel Complexes for NMR Studies.

**(dppp)NiCH<sub>3</sub>(OEt<sub>2</sub>)<sup>+</sup>(BAr'<sub>4</sub>)<sup>-</sup>, 2[OEt<sub>2</sub>].** dpppNi(CH<sub>3</sub>)<sub>2</sub> (5.0 mg, 0.010 mmol) and H(OEt<sub>2</sub>)<sub>2</sub>BAr'<sub>4</sub> (10 mg, 0.010 mmol) were combined in an NMR tube fitted with a septum. The tube was cooled to -80 °C and 0.5 mL CD<sub>2</sub>Cl<sub>2</sub> was added via syringe. The tube was agitated with slight warming to ensure complete dissolution and protonation. <sup>1</sup>H NMR (300 MHz, CD<sub>2</sub>Cl<sub>2</sub>, -80 °C) δ 7.30-7.73 (m, 20H, (C<sub>6</sub>H<sub>5</sub>)<sub>2</sub>PCH<sub>2</sub>CH<sub>2</sub>CH<sub>2</sub>P(C<sub>6</sub>H<sub>5</sub>)<sub>2</sub>), 3.28 (br, 4H, O(CH<sub>2</sub>CH<sub>3</sub>)<sub>2</sub>), 2.32 (br, 2H, PCH<sub>2</sub>CH<sub>2</sub>CH<sub>2</sub>P), 2.20 (br, 2H, PCH<sub>2</sub>CH<sub>2</sub>CH<sub>2</sub>P), 1.81 (br, 2H, PCH<sub>2</sub>CH<sub>2</sub>CH<sub>2</sub>P), 1.10 (br, 6H, O(CH<sub>2</sub>CH<sub>3</sub>)<sub>2</sub>), -0.08 (br, 3H, Ni-CH<sub>3</sub>). <sup>13</sup>C{<sup>1</sup>H} NMR (75 MHz, CD<sub>2</sub>Cl<sub>2</sub>, -80 °C) δ [(C<sub>6</sub>H<sub>5</sub>)<sub>2</sub>PCH<sub>2</sub>CH<sub>2</sub>CH<sub>2</sub>P(C<sub>6</sub>H<sub>5</sub>)<sub>2</sub>] 133.0 (d, <sup>2</sup>J<sub>CP</sub> = 11, *ortho*), 131.8 (d, <sup>2</sup>J<sub>CP</sub> = 10, *ortho'*), 131.3 (s, *meta*), 130.8 (s, *meta'*), 130.1 (s, *para*), 129.5 (s, *para*), 129.1 (d, <sup>1</sup>J<sub>CP</sub> = 10, *ipso*), 128.7 (d, <sup>1</sup>J<sub>CP</sub> = 9, *ipso'*), 67.7 (s, Ni-O(CH<sub>2</sub>CH<sub>3</sub>)<sub>2</sub>), 27.1 (dd, <sup>1</sup>J<sub>CP</sub> = 26, <sup>3</sup>J<sub>CP</sub> = 9, PCH<sub>2</sub>CH<sub>2</sub>CH<sub>2</sub>P), 26.7 (d, <sup>1</sup>J<sub>CP</sub> = 22, PCH<sub>2</sub>CH<sub>2</sub>CH<sub>2</sub>P), 17.0 (s, PCH<sub>2</sub>CH<sub>2</sub>CH<sub>2</sub>P), 14.4 (s, Ni-O(CH<sub>2</sub>CH<sub>3</sub>)<sub>2</sub>) 8.4 (dd, <sup>2</sup>J<sub>CPtrans</sub> = 55, <sup>2</sup>J<sub>CPcis</sub> = 37, Ni-CH<sub>3</sub>). <sup>31</sup>P{<sup>1</sup>H} NMR (121 MHz, CD<sub>2</sub>Cl<sub>2</sub>, -80 °C) δ 27.2 (d, <sup>2</sup>J<sub>PP</sub> = 30), 0.95 (d, <sup>2</sup>J<sub>PP</sub> = 30).

**(dppp)NiCH<sub>3</sub>(OH<sub>2</sub>)<sup>+</sup>(BAr'<sub>4</sub>)<sup>-</sup>, 2[OH<sub>2</sub>].** A solution of (dppp)NiCH<sub>3</sub>(OEt<sub>2</sub>)<sup>+</sup>(BAr'<sub>4</sub>)<sup>-</sup> in CD<sub>2</sub>Cl<sub>2</sub>/CDCl<sub>2</sub>F (50:50 v/v) was prepared similarly to that described above. To the solution at -80 °C was added 1 drop of degassed H<sub>2</sub>O via syringe. The NMR tube was agitated to ensure thorough mixing. <sup>1</sup>H NMR (300 MHz, CD<sub>2</sub>Cl<sub>2</sub>/CDCl<sub>2</sub>F, -80 °C) δ 7.4-7.6 (m, 20H, (C<sub>6</sub>H<sub>5</sub>)<sub>2</sub>PCH<sub>2</sub>CH<sub>2</sub>CH<sub>2</sub>P(C<sub>6</sub>H<sub>5</sub>)<sub>2</sub>), 4.56 (br,

Ni-OH<sub>2</sub>), 2.33 (br, 4H, PCH<sub>2</sub>CH<sub>2</sub>CH<sub>2</sub>P), 1.69 (br, 2H, PCH<sub>2</sub>CH<sub>2</sub>CH<sub>2</sub>P), -0.16 (br, 3H, Ni-CH<sub>3</sub>). <sup>31</sup>P{<sup>1</sup>H} NMR (121 MHz, CDCl<sub>2</sub>F, -80 °C) δ 31.9 (d, <sup>2</sup>J<sub>P</sub> = 37), 0.1 (d, <sup>2</sup>J<sub>PP</sub> = 37).

**(dppp)Ni(CO)COCH<sub>3</sub><sup>+</sup>(BAr'<sub>4</sub>)<sup>-</sup>, 4.** (dppp)NiCH<sub>3</sub>(OEt<sub>2</sub>)<sup>+</sup>(BAr'<sub>4</sub>)<sup>-</sup> was prepared as above. The solution at -80 °C was purged with a gentle stream of CO for 3-5 minutes. The solution was next warmed to -20 °C and purged with a gentle stream of argon for 30 minutes. <sup>1</sup>H NMR (300 MHz, CD<sub>2</sub>Cl<sub>2</sub>, -90 °C) δ 7.15-7.74 (m, 20H, (C<sub>6</sub>H<sub>5</sub>)<sub>2</sub>PCH<sub>2</sub>CH<sub>2</sub>CH<sub>2</sub>P(C<sub>6</sub>H<sub>5</sub>)<sub>2</sub>), 2.63 (br m, 2H, PCH<sub>2</sub>CH<sub>2</sub>CH<sub>2</sub>P), 2.32 (br m, 2H, PCH<sub>2</sub>CH<sub>2</sub>CH<sub>2</sub>P), 1.87 (br, 3H, Ni-COCH<sub>3</sub>), 1.65 (br m, 2H, PCH<sub>2</sub>CH<sub>2</sub>CH<sub>2</sub>P). <sup>13</sup>C{<sup>1</sup>H} NMR (75 MHz, CD<sub>2</sub>Cl<sub>2</sub>, -90 °C) δ 243.0 (d, <sup>2</sup>J<sub>CP</sub> = 48, Ni-COCH<sub>3</sub>), 180.6 (dd, <sup>2</sup>J<sub>CP</sub> = 52, <sup>2</sup>J<sub>CP</sub> = 15, Ni-CO), 133.4, 132.5, 132.4, 132.0, 131.6, 131.0, 130.8, 129.9, 129.3, 129.1, 124.9, 124.3, 123.6 ((C<sub>6</sub>H<sub>5</sub>)<sub>2</sub>PCH<sub>2</sub>CH<sub>2</sub>CH<sub>2</sub>P(C<sub>6</sub>H<sub>5</sub>)<sub>2</sub>), 39.0 (dd, <sup>3</sup>J<sub>CP</sub> = 26, <sup>3</sup>J<sub>CP</sub> = 14 Ni-COCH<sub>3</sub>), 24.0 (d, <sup>1</sup>J<sub>CP</sub> = 37, PCH<sub>2</sub>CH<sub>2</sub>CH<sub>2</sub>P), 23.6 (d, <sup>1</sup>J<sub>CP</sub> = 42, PCH<sub>2</sub>CH<sub>2</sub>CH<sub>2</sub>P), 17.5 (s, PCH<sub>2</sub>CH<sub>2</sub>CH<sub>2</sub>P). <sup>31</sup>P{<sup>1</sup>H} NMR (121 MHz, CD<sub>2</sub>Cl<sub>2</sub>, -80 °C) δ 3.13 (d, <sup>2</sup>J<sub>PP</sub> = 57), -1.28 (d, <sup>2</sup>J<sub>PP</sub> = 57). IR (CH<sub>2</sub>Cl<sub>2</sub>, -80 °C) ν<sub>CO</sub> = 2082 cm<sup>-1</sup>, ν<sub>acyl</sub> = 1698 cm<sup>-1</sup>.

**(dppp)Ni(CO)<sub>2</sub>COCH<sub>3</sub><sup>+</sup>(BAr'<sub>4</sub>)<sup>-</sup>, 5.** (dppp)NiCH<sub>3</sub>(OEt<sub>2</sub>)<sup>+</sup>(BAr'<sub>4</sub>)<sup>-</sup> was prepared as above. The solution at -140 °C was purged with a gentle stream of CO for ca. 2 minutes. <sup>1</sup>H NMR (400 MHz, CD<sub>2</sub>Cl<sub>2</sub>, -80 °C) δ 7.15-7.74 (m, 20H, (C<sub>6</sub>H<sub>5</sub>)<sub>2</sub>PCH<sub>2</sub>CH<sub>2</sub>CH<sub>2</sub>P(C<sub>6</sub>H<sub>5</sub>)<sub>2</sub>), 2.59 (br m, 4H, PCH<sub>2</sub>CH<sub>2</sub>CH<sub>2</sub>P), 2.20 (br, 3H, Ni-COCH<sub>3</sub>), 1.92 (br m, 2H, PCH<sub>2</sub>CH<sub>2</sub>CH<sub>2</sub>P). <sup>13</sup>C{<sup>1</sup>H} NMR (100 MHz, CD<sub>2</sub>Cl<sub>2</sub>, -90 °C) δ 219.1 (d, <sup>2</sup>J<sub>CP</sub> = 45, Ni-COCH<sub>3</sub>), 183.8 (br, Ni-(CO)<sub>2</sub>), 131.5, 129.2, 129.0 ((C<sub>6</sub>H<sub>5</sub>)<sub>2</sub>PCH<sub>2</sub>CH<sub>2</sub>CH<sub>2</sub>P(C<sub>6</sub>H<sub>5</sub>)<sub>2</sub>), 46.5 (br d, Ni-COCH<sub>3</sub>), 25.5 (br, PCH<sub>2</sub>CH<sub>2</sub>CH<sub>2</sub>P), 17.0 (s, PCH<sub>2</sub>CH<sub>2</sub>CH<sub>2</sub>P). <sup>31</sup>P{<sup>1</sup>H} NMR (162 MHz, CD<sub>2</sub>Cl<sub>2</sub>, -90 °C) δ 11.65 (d, <sup>2</sup>J<sub>PP</sub> = 85), -

0.19 (d,  $^2J_{PP} = 85$ ). IR ( $\text{CH}_2\text{Cl}_2$ ,  $-80\text{ }^\circ\text{C}$ )  $\nu_{\text{CO}(\text{sym})} = 2094\text{ cm}^{-1}$ ,  $\nu_{\text{CO}(\text{asym})} = 2059\text{ cm}^{-1}$ ,  $\nu_{\text{acyl}} = 1733\text{ cm}^{-1}$ .

The  $^{13}\text{C}$  labeled compound was made in an analogous manner in  $\text{CDCl}_2\text{F}$  using  $^{13}\text{CO}$ .  $^{13}\text{C}\{^1\text{H}\}$  NMR (75 MHz,  $\text{CDCl}_2\text{F}$ ,  $-90\text{ }^\circ\text{C}$ )  $\delta$  221.3 (br d,  $^2J_{CP} = 45$ , Ni-COCH<sub>3</sub>), 184.5 (dd,  $^2J_{CP} = 24$ ,  $^2J_{CP} = 22$ , Ni-(CO)<sub>2</sub>).  $^{31}\text{P}\{^1\text{H}\}$  NMR (121 MHz,  $\text{CDCl}_2\text{F}$ ,  $-110\text{ }^\circ\text{C}$ )  $\delta$  11.8 (ddt,  $^2J_{PP} = 85$ ,  $^2J_{\text{PC}(\text{acyl})} = 45$ ,  $^2J_{\text{PC}(\text{carbonyl})} = 22$ ), -1.25 (dtd,  $^2J_{PP} = 85$ ,  $^2J_{\text{PC}(\text{carbonyl})} = 24$ ,  $^2J_{\text{PC}(\text{acyl})} = 5$ ).

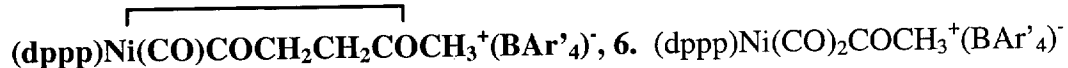

was prepared as above.  $\text{C}_2\text{H}_4$  (1.05 equiv.) was added via syringe to the solution at  $-80\text{ }^\circ\text{C}$ . The solution was allowed to warm to  $-45\text{ }^\circ\text{C}$ . The reaction was monitored with  $^1\text{H}$  and  $^{31}\text{P}\{^1\text{H}\}$  NMR spectroscopy until complete conversion to the chelate complex was observed. IR ( $\text{CH}_2\text{Cl}_2$ ,  $-80\text{ }^\circ\text{C}$ )  $\nu_{\text{CO}} = 2045\text{ cm}^{-1}$ . The chirality at Ni in complex **6** greatly complicated the  $^1\text{H}$  spectrum as there are five sets of diastereotopic methylenes with the central methylene of the phosphine ligand being the only decipherable set as revealed by  $^1\text{H}$  COSY (see  $^1\text{H}$  data below).  $^1\text{H}$  NMR (300 MHz,  $\text{CD}_2\text{Cl}_2$ ,  $-85\text{ }^\circ\text{C}$ )  $\delta$  6.9-8.1 (m, 20H,  $(\text{C}_6\text{H}_5)_2\text{PCH}_2\text{CH}_2\text{CH}_2\text{P}(\text{C}_6\text{H}_5)_2$ ), 2.49-2.96 (m, 8H,  $\text{PCH}_2\text{CH}_2\text{CH}_2\text{P}$  and  $\text{NiCOCH}_2\text{CH}_2\text{COCH}_3$ ), 2.35 (s, 3H,  $\text{NiCOCH}_2\text{CH}_2\text{COCH}_3$ ), 1.75 (br d, 1H,  $^2J_{\text{HaHa}'} = 15$ ,  $\text{PCH}_2\text{CHaHa}'\text{CH}_2\text{P}$ ), 1.32 (app. t, 1H,  $\text{PCH}_2\text{CHaHa}'\text{CH}_2\text{P}$ ).  $^1\text{H}\{\text{COSY}\}$  exposed  $^2J_{\text{HH}}$  coupling between the resonances at  $\delta$  1.75 and 1.32 (see below for spectrum).  $^{13}\text{C}\{^1\text{H}\}$  NMR (75 MHz,  $\text{CD}_2\text{Cl}_2$ ,  $-85\text{ }^\circ\text{C}$ )  $\delta$  241.2 (d,  $^2J_{CP} = 58$ , Ni-COCH<sub>2</sub>CH<sub>2</sub>COCH<sub>3</sub>), 223.1 (s, Ni-COCH<sub>2</sub>CH<sub>2</sub>COCH<sub>3</sub>), 180.1 (dd,  $^2J_{CP} = 47$ ,  $^2J_{CP} = 24$ , Ni-(CO)), 124.7-133.8 ( $(\text{C}_6\text{H}_5)_2\text{PCH}_2\text{CH}_2\text{CH}_2\text{P}(\text{C}_6\text{H}_5)_2$ ), 37.8 (s, Ni-COCH<sub>2</sub>CH<sub>2</sub>COCH<sub>3</sub>), 37.6 (d,  $^3J_{CP} = 28\text{ Hz}$ ,

Ni-COCH<sub>2</sub>CH<sub>2</sub>COCH<sub>3</sub>), 31.6 (s, Ni-COCH<sub>2</sub>CH<sub>2</sub>COCH<sub>3</sub>), 23.4 (d, <sup>1</sup>J<sub>CP</sub> = 24 Hz, PCH<sub>2</sub>CH<sub>2</sub>CH<sub>2</sub>P), 22.5 (d, <sup>1</sup>J<sub>CP</sub> = 22 Hz, PCH<sub>2</sub>CH<sub>2</sub>CH<sub>2</sub>P), 16.8 (s, PCH<sub>2</sub>CH<sub>2</sub>CH<sub>2</sub>P). <sup>31</sup>P{<sup>1</sup>H} NMR (121 MHz, CD<sub>2</sub>Cl<sub>2</sub>, -85 °C) δ 9.38 (d, <sup>2</sup>J<sub>PP</sub> = 78), -5.50 (d, <sup>2</sup>J<sub>PP</sub> = 78).

The <sup>13</sup>C labeled compound was made in an analogous manner using <sup>13</sup>CO.

<sup>13</sup>C{<sup>1</sup>H} NMR (100 MHz, CD<sub>2</sub>Cl<sub>2</sub>, -90 °C) δ 241.4 (br d, <sup>2</sup>J<sub>CP</sub> = 58, Ni-COCH<sub>2</sub>CH<sub>2</sub>COCH<sub>3</sub>), 223.1 (s, Ni-COCH<sub>2</sub>CH<sub>2</sub>COCH<sub>3</sub>), 179.9 (ddd, <sup>2</sup>J<sub>CP</sub> = 47, <sup>2</sup>J<sub>CP</sub> = 24, <sup>2</sup>J<sub>CC</sub> = 6, Ni-(CO)). <sup>31</sup>P{<sup>1</sup>H} NMR (162 MHz, CD<sub>2</sub>Cl<sub>2</sub>, -90 °C) δ 9.54 (ddd, <sup>2</sup>J<sub>PP</sub> = 78, <sup>2</sup>J<sub>PC(acyl)</sub> = 58, <sup>2</sup>J<sub>PC(carbonyl)</sub> = 24), -5.73 (ddd, <sup>2</sup>J<sub>PP</sub> = 78, <sup>2</sup>J<sub>PC(carbonyl)</sub> = 47, <sup>2</sup>J<sub>PC(acyl)</sub> = 11).

**(dppp)NiCH<sub>2</sub>CH<sub>2</sub>COCH<sub>3</sub><sup>+</sup>(BAR'<sub>4</sub>)<sup>-</sup>, 7.** A solution of complex **6** was prepared as described above. Argon was purged through the solution for 20 minutes with warming to -15 °C. <sup>1</sup>H NMR (300 MHz, CD<sub>2</sub>Cl<sub>2</sub>, -60 °C) δ 7.37-7.59 (m, 20 H, (C<sub>6</sub>H<sub>5</sub>)<sub>2</sub>PCH<sub>2</sub>CH<sub>2</sub>CH<sub>2</sub>P(C<sub>6</sub>H<sub>5</sub>)<sub>2</sub>), 2.78 (br, 2H, Ni-CH<sub>2</sub>CH<sub>2</sub>COCH<sub>3</sub>), 2.33 (br 4H, PCH<sub>2</sub>CH<sub>2</sub>CH<sub>2</sub>P), 2.24 (s, 3H, Ni-CH<sub>2</sub>CH<sub>2</sub>COCH<sub>3</sub>), 1.79 (br, 2H, PCH<sub>2</sub>CH<sub>2</sub>CH<sub>2</sub>P), 0.92 (Ni-CH<sub>2</sub>CH<sub>2</sub>COCH<sub>3</sub>). <sup>13</sup>C{<sup>1</sup>H} NMR (75 MHz, CD<sub>2</sub>Cl<sub>2</sub>, -40 °C) δ 239.6 (d, <sup>2</sup>J<sub>CP</sub> = 14, Ni-CH<sub>2</sub>CH<sub>2</sub>COCH<sub>3</sub>), 124.6-132.7 ((C<sub>6</sub>H<sub>5</sub>)<sub>2</sub>PCH<sub>2</sub>CH<sub>2</sub>CH<sub>2</sub>P(C<sub>6</sub>H<sub>5</sub>)<sub>2</sub>), 51.0 (s, Ni-CH<sub>2</sub>CH<sub>2</sub>COCH<sub>3</sub>), 29.4 (dd, <sup>2</sup>J<sub>CP</sub> = 56 Hz, <sup>2</sup>J<sub>CP</sub> = 26, Ni-CH<sub>2</sub>CH<sub>2</sub>COCH<sub>3</sub>), 27.3 (s, Ni-CH<sub>2</sub>CH<sub>2</sub>COCH<sub>3</sub>), 26.4 (br d, <sup>1</sup>J<sub>CP</sub> = 28 Hz, PCH<sub>2</sub>CH<sub>2</sub>CH<sub>2</sub>P), 25.5 (d, <sup>1</sup>J<sub>CP</sub> = 25 Hz, PCH<sub>2</sub>CH<sub>2</sub>CH<sub>2</sub>P), 18.2 (s, PCH<sub>2</sub>CH<sub>2</sub>CH<sub>2</sub>P). <sup>31</sup>P{<sup>1</sup>H} NMR (121 MHz, CD<sub>2</sub>Cl<sub>2</sub>, -60 °C) δ 28.9 (d, <sup>2</sup>J<sub>PP</sub> = 40), -1.95 (d, <sup>2</sup>J<sub>PP</sub> = 40).

**(dppp)NiCH<sub>3</sub>(C<sub>2</sub>H<sub>4</sub>)<sup>+</sup>(BAR'<sub>4</sub>)<sup>-</sup>, 8.** A solution of (dppp)NiCH<sub>3</sub>(OEt<sub>2</sub>)<sup>+</sup>(BAR'<sub>4</sub>)<sup>-</sup> in CDCl<sub>2</sub>F was prepared in a manner similar to that described above. The solution was cooled to -130 °C and C<sub>2</sub>H<sub>4</sub> (ca. 25 equiv.) was added to the solution via syringe. <sup>1</sup>H

NMR (300 MHz,  $\text{CDCl}_2\text{F}$ ,  $-105^\circ\text{C}$ )  $\delta$  7.25-7.55 (m, 20H,  $(\text{C}_6\text{H}_5)_2\text{PCH}_2\text{CH}_2\text{CH}_2\text{P}(\text{C}_6\text{H}_5)_2$ ),  $\eta^2\text{-CH}_2\text{CH}_2$  was not observed due to fast exchange with non-coordinated ethylene ( $\delta$  5.4), 2.3-2.7 (br, 4H,  $\text{PCH}_2\text{CH}_2\text{CH}_2\text{P}$ ), 1.7-2.0 (br, 2H,  $\text{PCH}_2\text{CH}_2\text{CH}_2\text{P}$ ), -0.01 (br, 3H, Ni- $\text{CH}_3$ ).  $^{31}\text{P}\{^1\text{H}\}$  NMR (121 MHz,  $\text{CDCl}_2\text{F}$ ,  $-105^\circ\text{C}$ )  $\delta$  13.3 (d,  $^2J_{\text{PP}} = 45$ ), 2.09 (d,  $^2J_{\text{PP}} = 45$ ).

**(dppp)NiCH<sub>2</sub>CH<sub>2</sub>- $\mu$ -H<sup>+</sup>(BAr'<sub>4</sub>)<sup>-</sup>, 10.** A solution of (dppp)NiCH<sub>3</sub>(OEt<sub>2</sub>)<sup>+</sup>(BAr'<sub>4</sub>)<sup>-</sup> in  $\text{CDCl}_2\text{F}$  was prepared in a manner similar to that described above. The solution was cooled to  $-130^\circ\text{C}$  and  $\text{C}_2\text{H}_4$  (ca. 30 equiv.) was added to the solution via syringe. The solution was warmed to  $-50^\circ\text{C}$  where the loss of propylene and the formation of butenes was observed.  $^1\text{H}$  NMR (300 MHz,  $\text{CDCl}_2\text{F}$ ,  $-113^\circ\text{C}$ )  $\delta$  7.24-7.47 (m, 20H,  $(\text{C}_6\text{H}_5)_2\text{PCH}_2\text{CH}_2\text{CH}_2\text{P}(\text{C}_6\text{H}_5)_2$ ), 2.5 (br, 4H,  $\text{PCH}_2\text{CH}_2\text{CH}_2\text{P}$ ), 1.92 (br, 2H,  $\text{PCH}_2\text{CH}_2\text{CH}_2\text{P}$ ), (resonance for Ni- $\text{CH}_2\text{CH}_3$  was obscured by free diethyl ether ( $\delta$  1.1)), -1.0 (br, 3H, Ni- $\text{CH}_2\text{CH}_3$ ).  $^{31}\text{P}\{^1\text{H}\}$  NMR (121 MHz,  $\text{CDCl}_2\text{F}$ ,  $-113^\circ\text{C}$ )  $\delta$  27.6 (br), 3.28 (br).

The  $^{13}\text{C}$  labeled version was made in a similar manner using ca. 8 equiv.  $^{13}\text{CH}_2^{13}\text{CH}_2$ .  $^1\text{H}$  NMR (300 MHz,  $\text{CDCl}_2\text{F}$ ,  $-45^\circ\text{C}$ )  $\delta$  -1.0 (br d,  $^1J_{\text{CH}} \sim 125$ , 3H, Ni- $\text{CH}_2\text{CH}_3$ ).  $^1\text{H}$  NMR (300 MHz,  $\text{CDCl}_2\text{F}$ ,  $-113^\circ\text{C}$ )  $\delta$  -1.0 (br, 3H, Ni- $\text{CH}_2\text{CH}_3$ ).  $^{13}\text{C}$  NMR (75 MHz,  $\text{CDCl}_2\text{F}$ ,  $-113^\circ\text{C}$ )  $\delta$  30.0 (br t,  $^1J_{\text{CH}} = 160$ , Ni- $\text{CH}_2\text{CH}_3$ ), 3.17 (dq,  $^1J_{\text{CC}} = 32$ ,  $^1J_{\text{CH}} = 124$ , Ni- $\text{CH}_2\text{CH}_3$ ).

## References

- 1) Pangborn, A. B.; Giardello, M. A.; Grubbs, R. H.; Rosen, R. K.; Timmers, F. J. *Organometallics* **1996**, 15, 1518.
- 2) Siegel, J. S.; Anet, F. A. L. *J. Org. Chem* **1988**, 53, 2629.

- 3) Brookhart, M.; Grant, B.; Volpe Jr., A. F. *Organometallics* **1992**, *11*, 3920.  
4) LaPointe, A.; Brookhart, M. *Organometallics* **1998**, *17*, 1530.  
5) Ammann, C.; Meier, P.; Merbach, A. E. *J. Magn. Reson.* **1982**, *46*, 319.  
6) Kohara, T.; Yamamoto, T.; Yamamoto, A. *J. Organomet. Chem.* **1980**, *192*, 265.

## II. Kinetic Data

Kinetic Data for the migratory insertion of 8.

$$T = 177.5 \text{ K}$$

$$k = 9.3 \times 10^{-4} \text{ s}^{-1}$$

$$\Delta G^\ddagger = 12.7 \text{ kcal/mol}$$

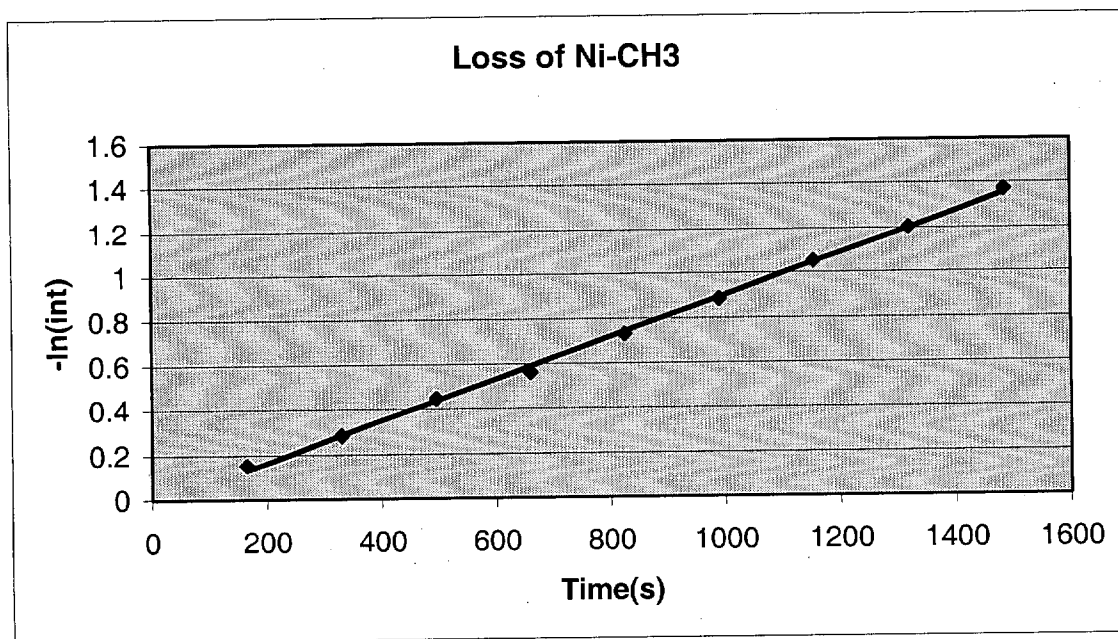



S 10

### III. Representative NMR and IR spectra: $^{13}\text{C}\{^1\text{H}\}$ spectrum of $2[\text{OEt}_2]$

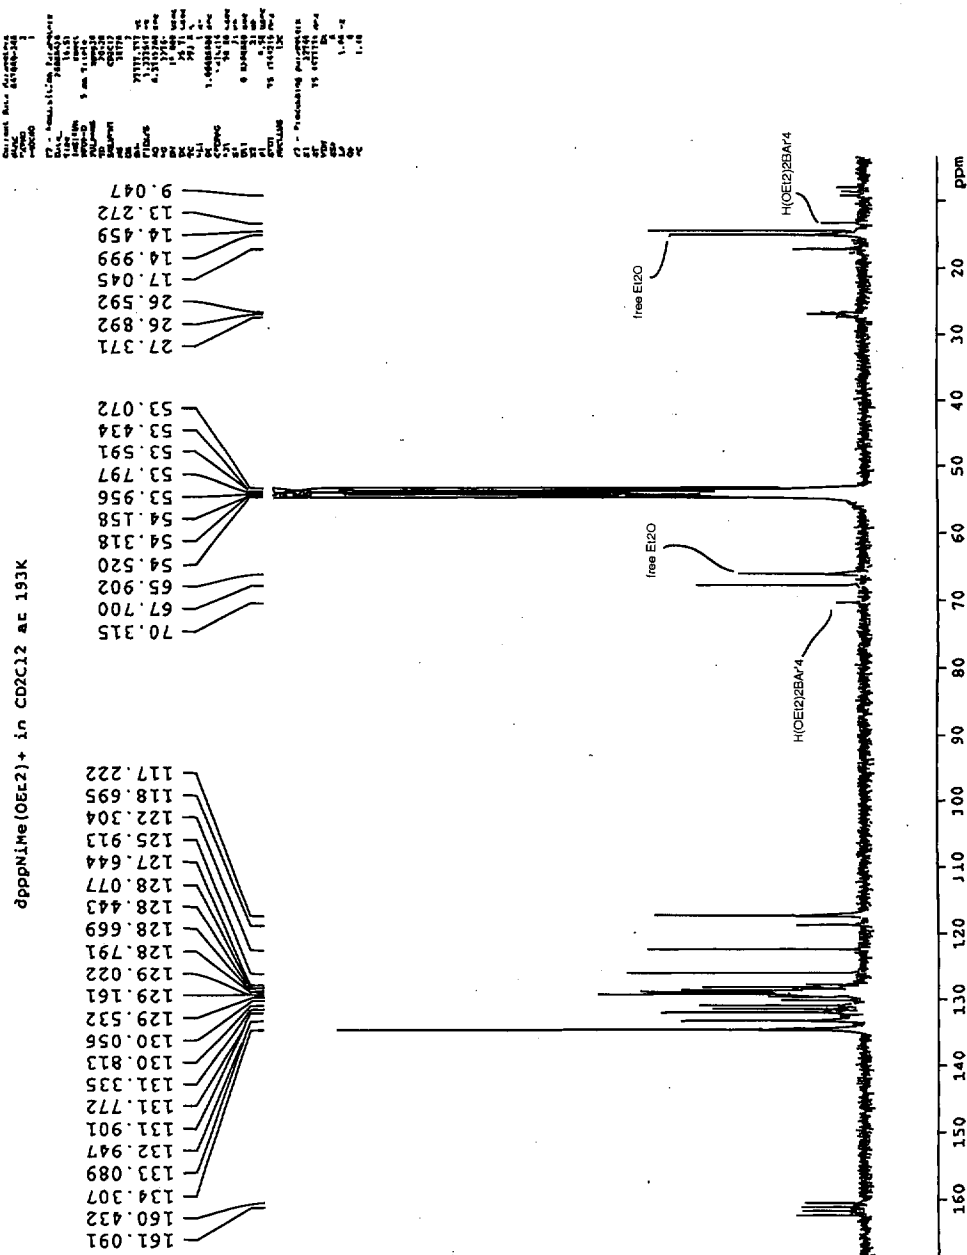

10

S11

$^3\text{P}\{^1\text{H}\}$  spectrum of  $2[\text{OEt}_2]$

$\delta\text{ppmNiMe}_2 + \text{H}(\text{OEt}_2)2\text{BAr}'_4$  at 193K in  $\text{CD}_2\text{Cl}_2$

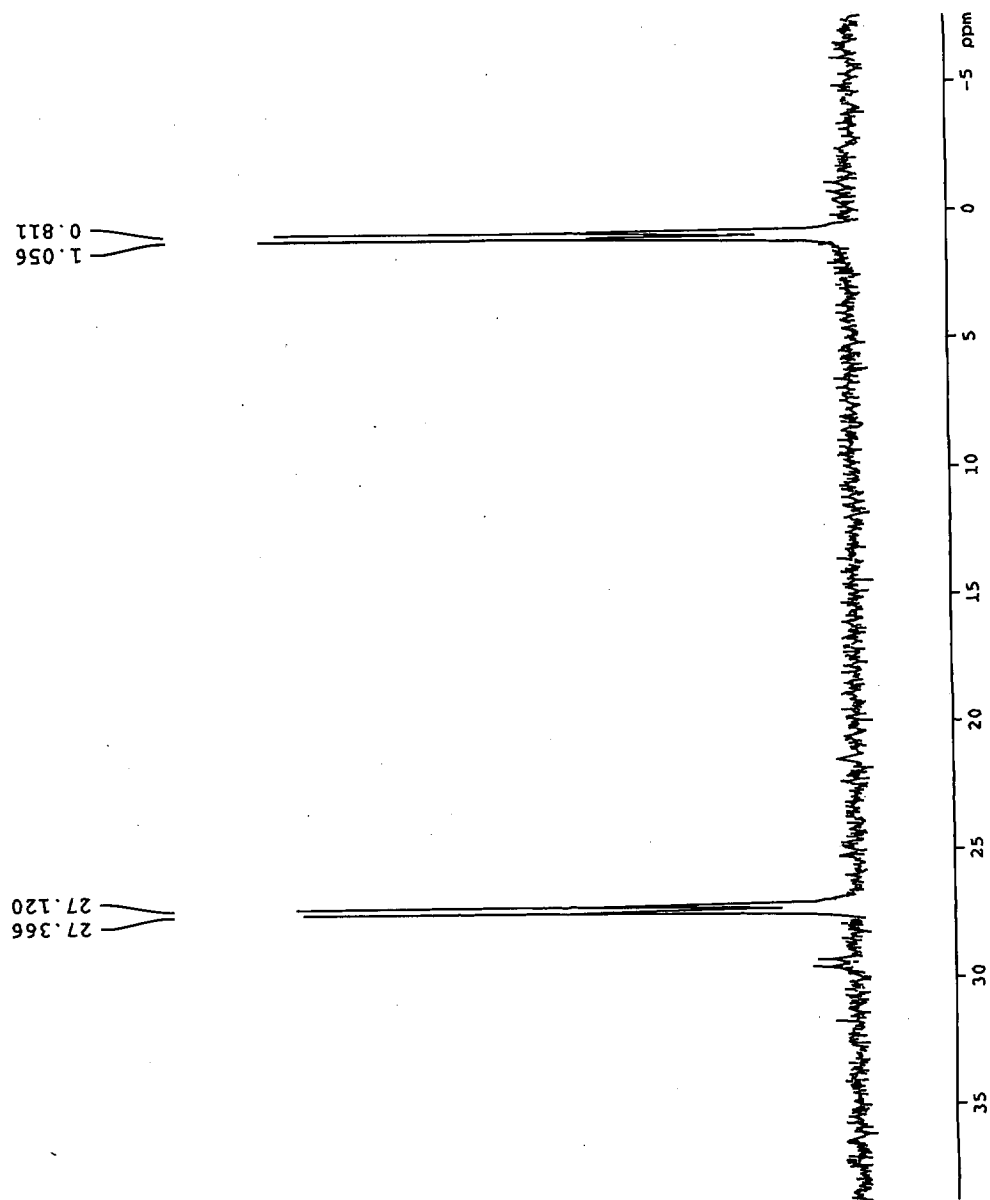

S 12

IR spectrum of **5** generated from unlabeled CO.

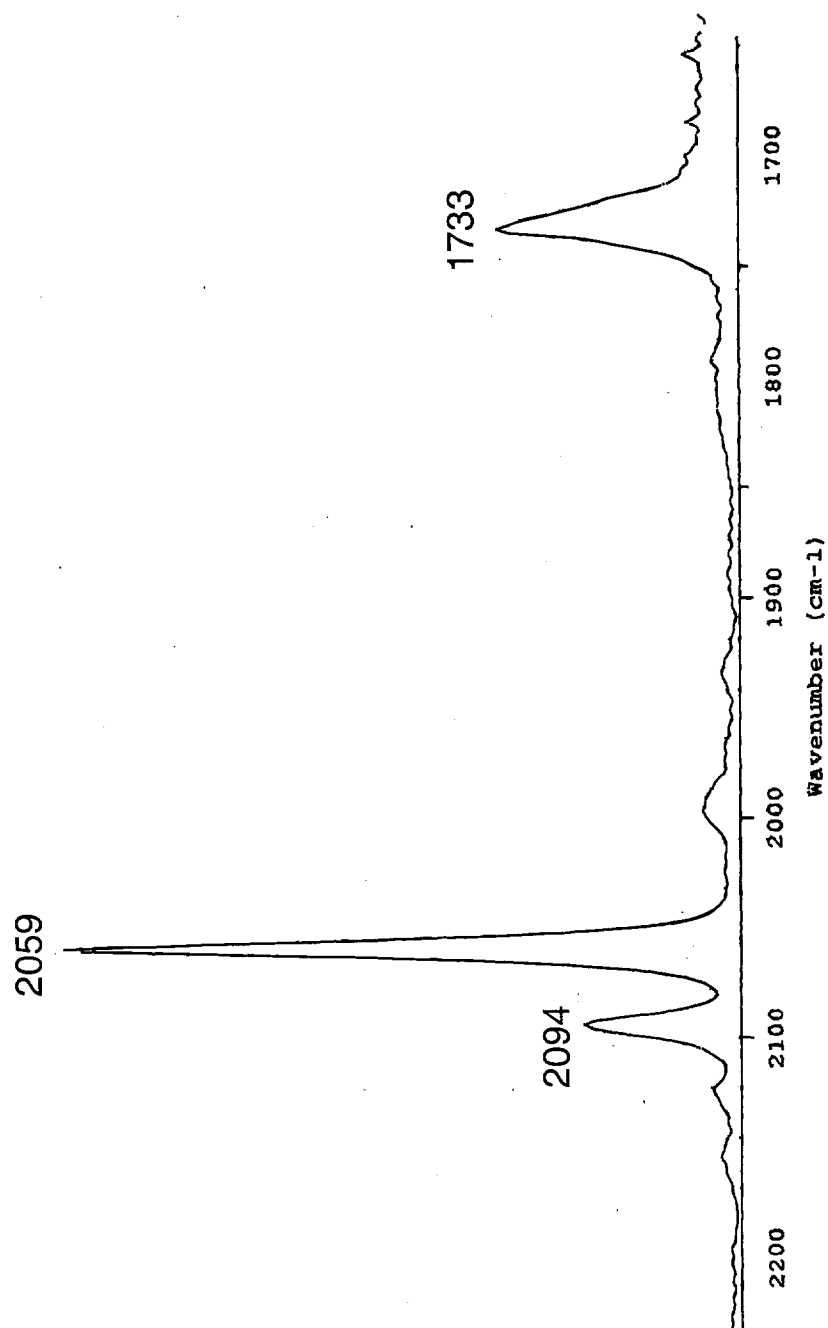

S 13

 $^{13}\text{C}\{^1\text{H}\}$  NMR spectrum of **5** generated from unlabeled CO $\delta$  ppm Ni(CO)<sub>2</sub>COMe<sup>+</sup> in CD<sub>2</sub>Cl<sub>2</sub> at 183 K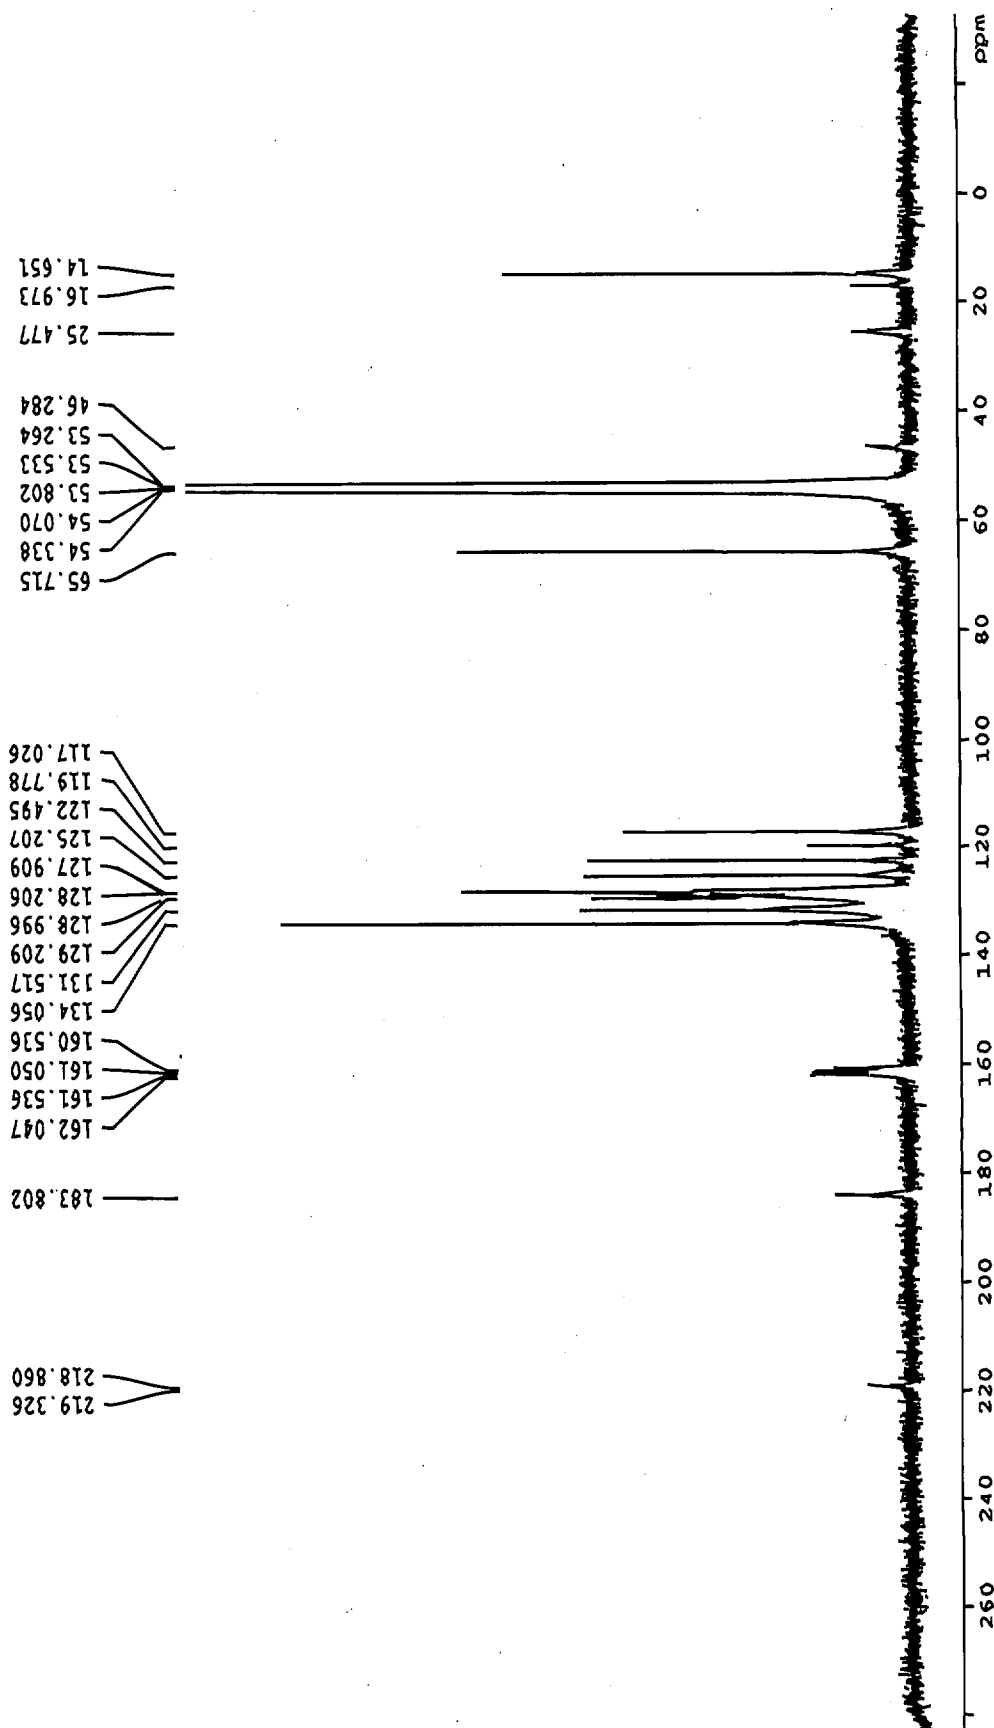

S 14

$^3\text{P}\{^1\text{H}\}$  NMR spectrum of **5** generated from unlabeled CO.

$\delta_{\text{ppm}}(\text{CO})_2\text{COME}$  in  $\text{CD}_2\text{Cl}_2$  at 183K

11.919  
11.403

0.070  
-0.452

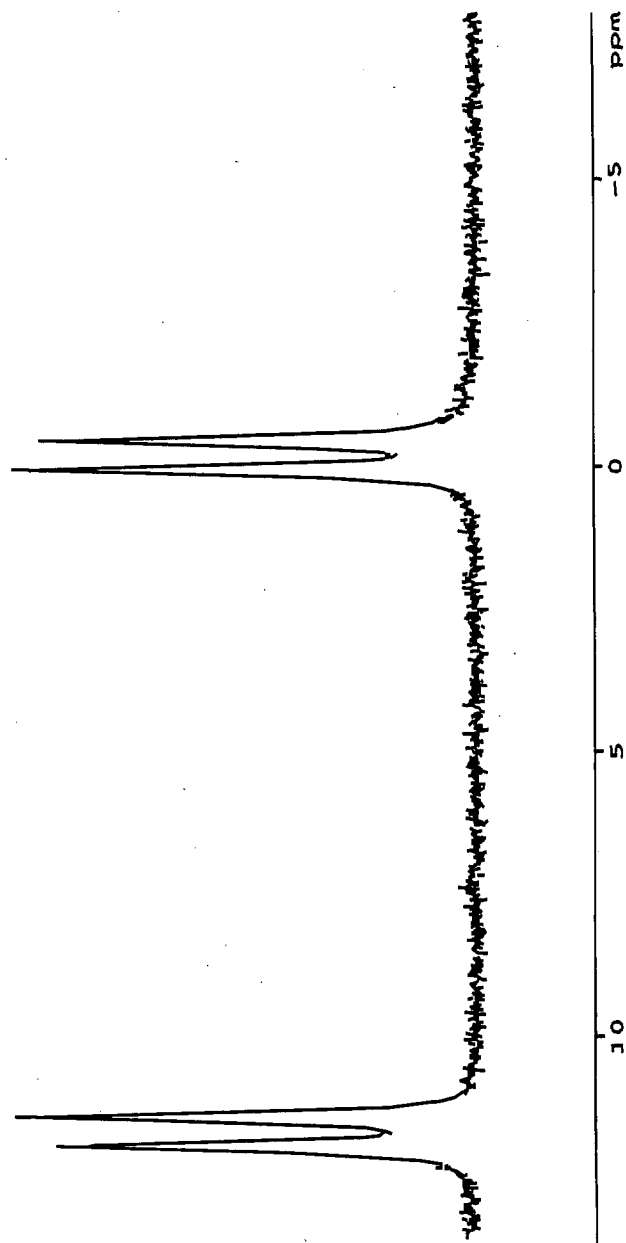

S15

 $^3\text{P}\{^1\text{H}\}$  spectrum of **5** generated using  $^{13}\text{CO}$ .dpppNi( $^{13}\text{CO}$ ) $_2$   $^{13}\text{COCH}_3$  in  $\text{CDCl}_2\text{F}$  at 163K on the 300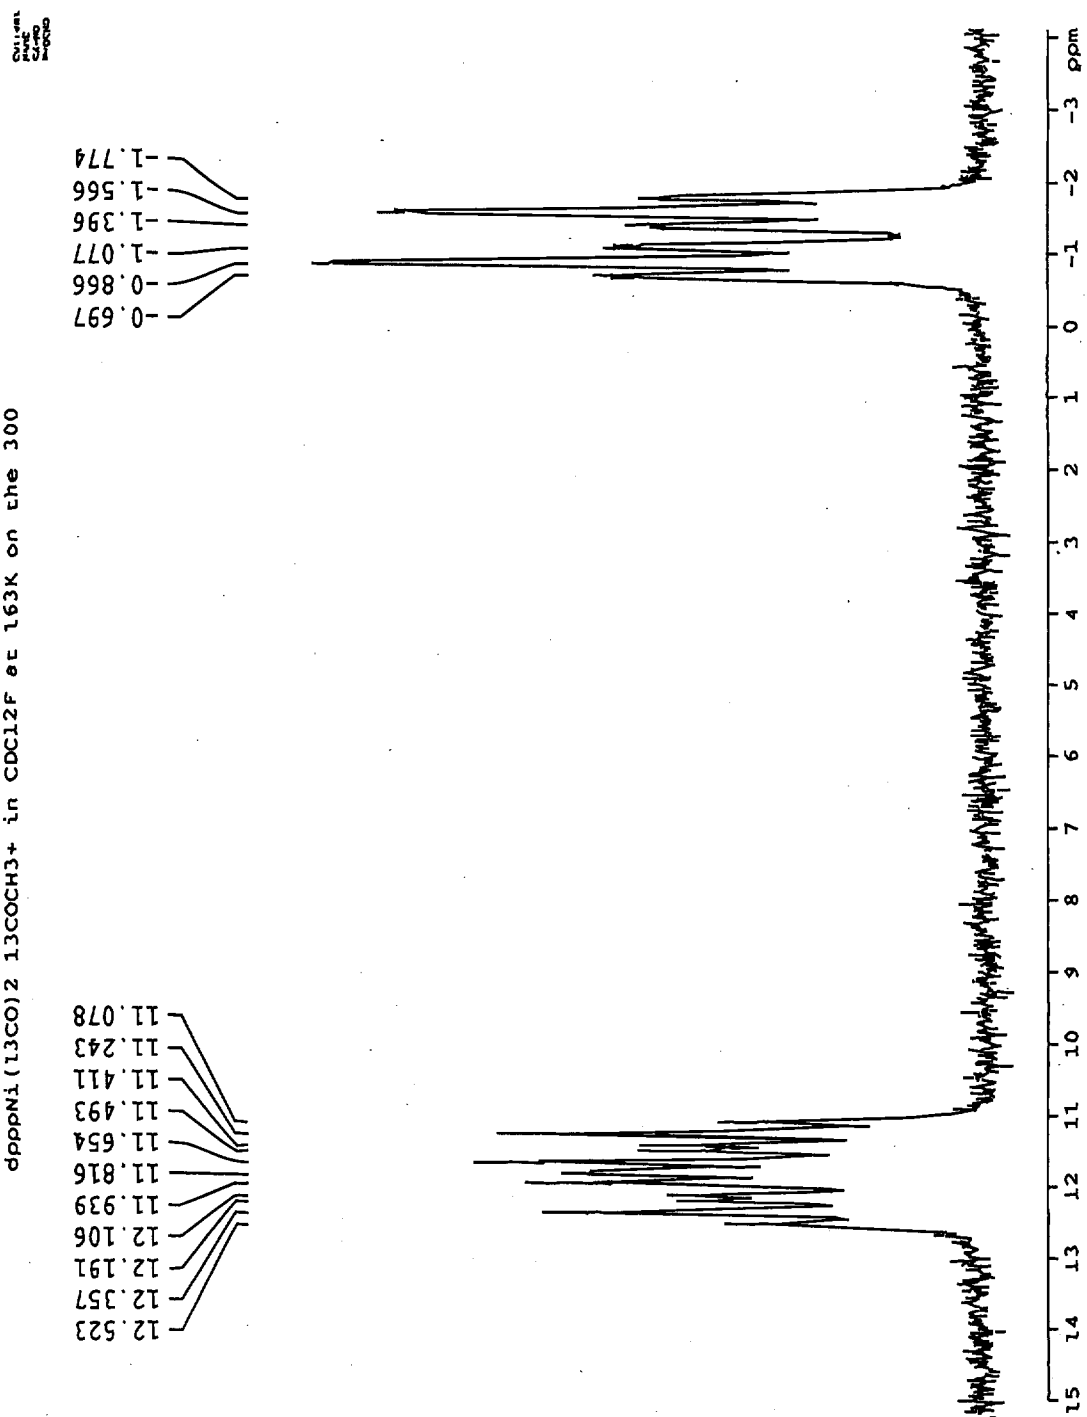

$^{13}\text{C} \{^1\text{H}\}$  NMR spectrum of **6** generated from  $^{13}\text{CO}$ .

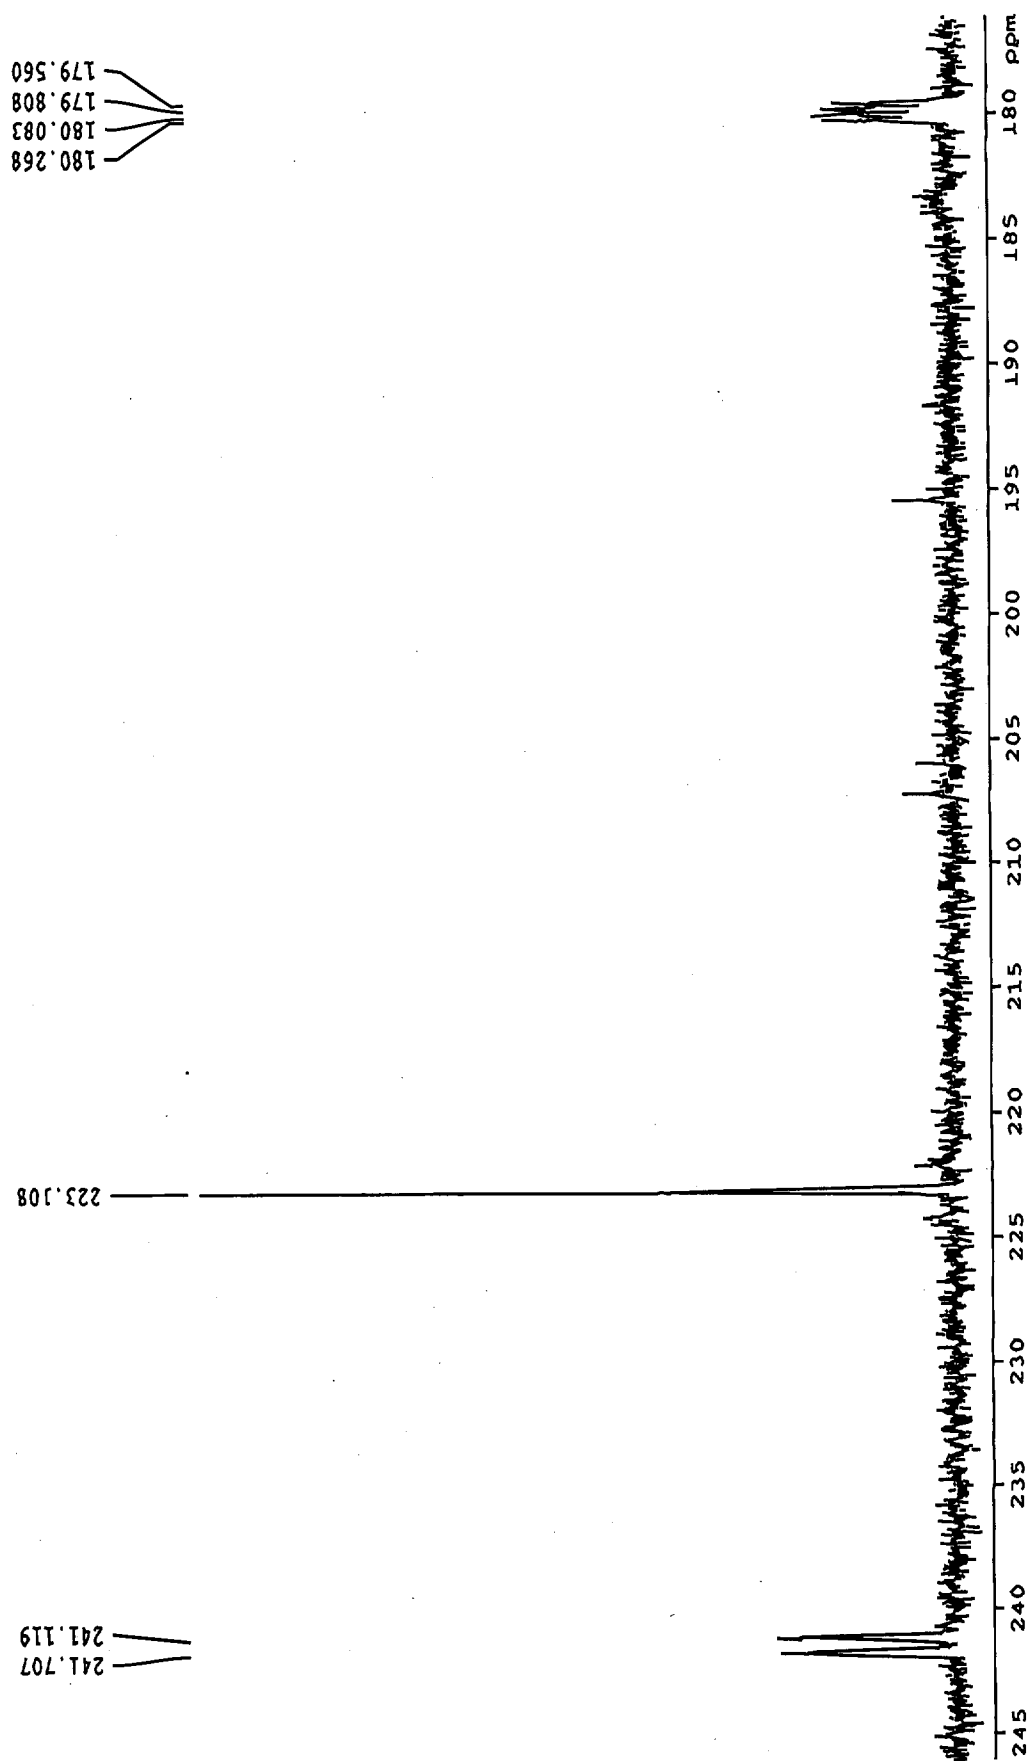

S 17

$^3\text{P}\{^1\text{H}\}$  NMR spectrum of **6** generated from  $^{13}\text{CO}$ .

after insert  $^{13}\text{CO}$  and ethylene at 183K

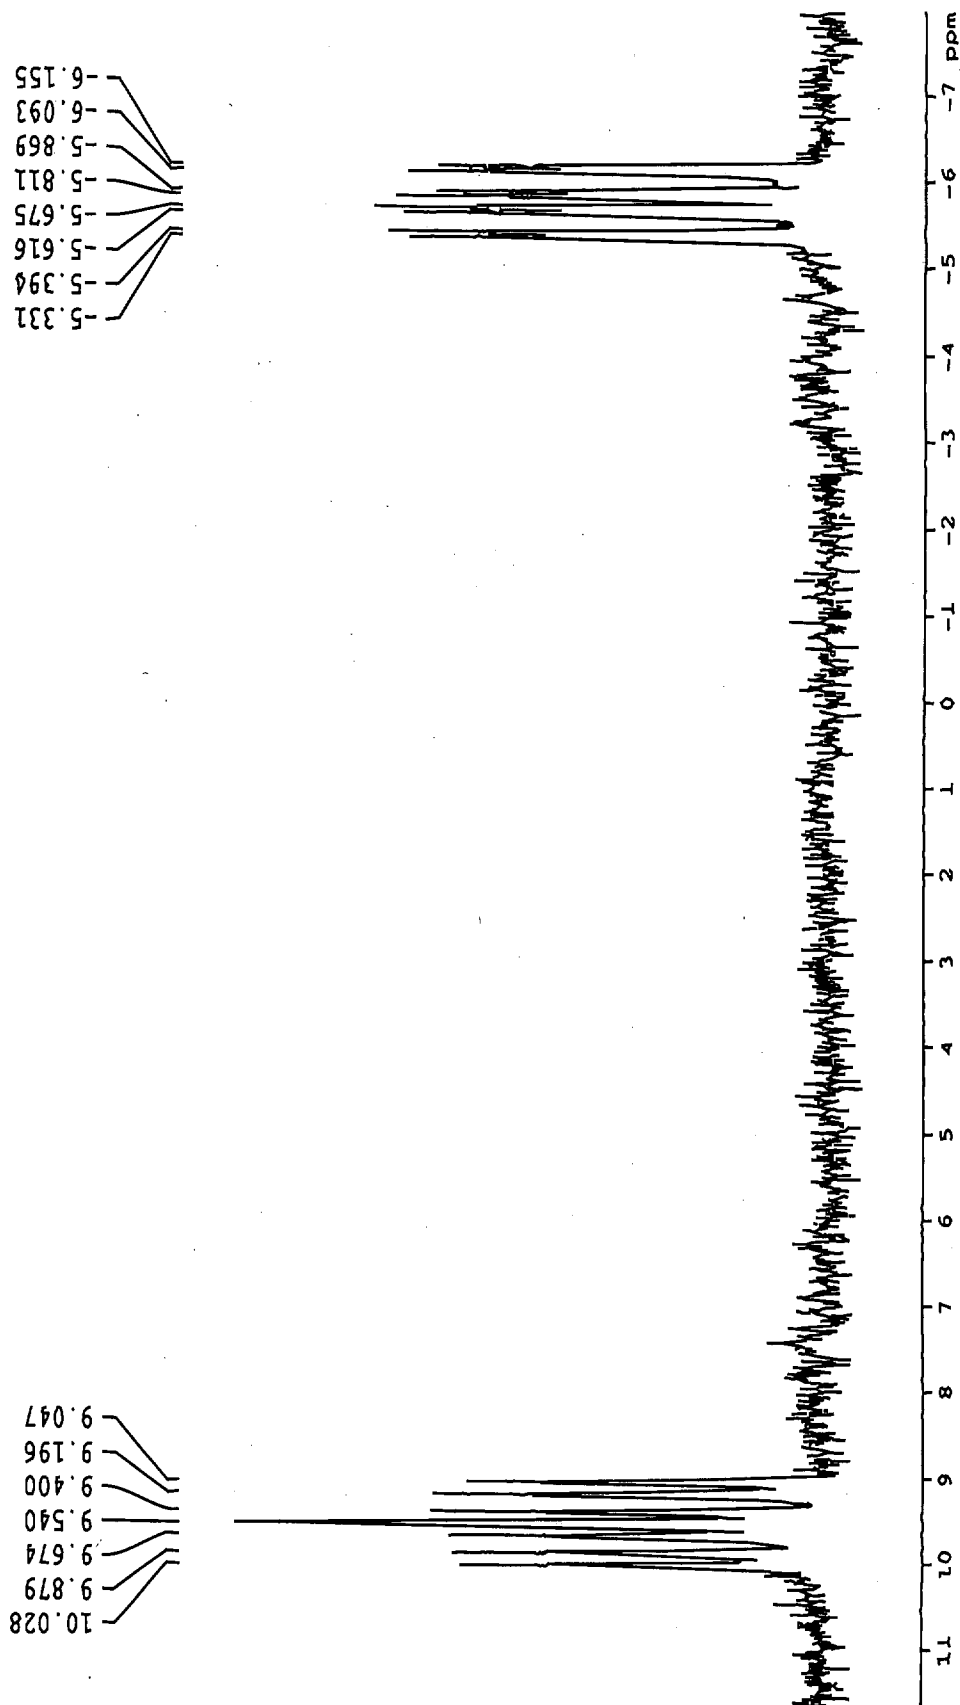



S 18

<sup>1</sup>H COSY of complex 6.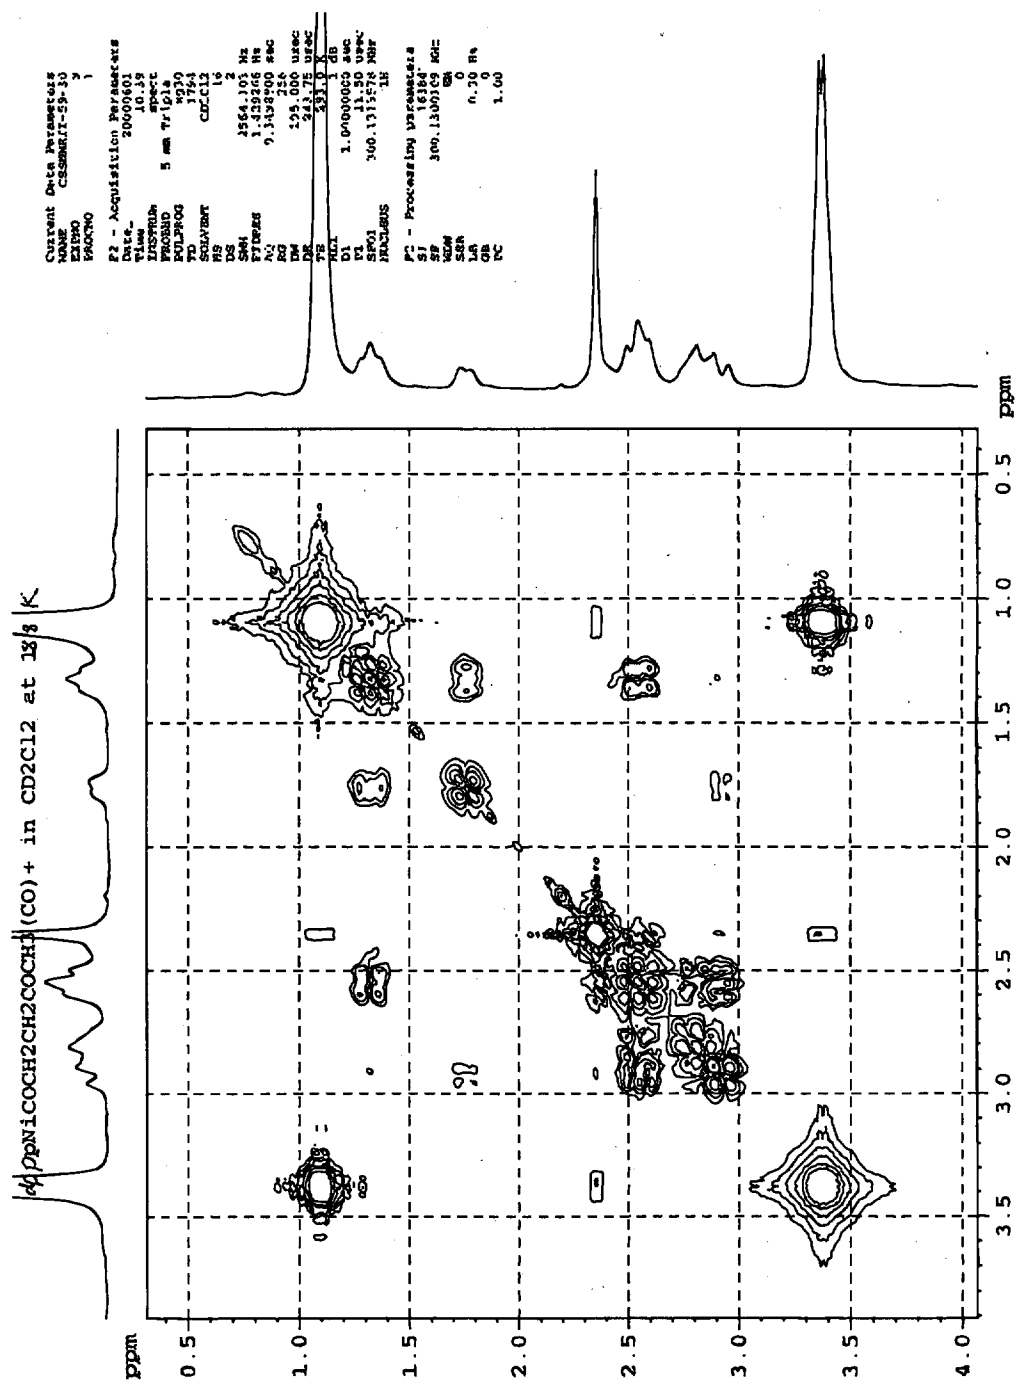

S 19

$^{13}\text{C}$  NMR spectrum of 7.

$\text{dpppNi}(\text{CH}_2\text{CH}_2\text{COCH}_3)_2$  in  $\text{CH}_2\text{Cl}_2$  at 233K

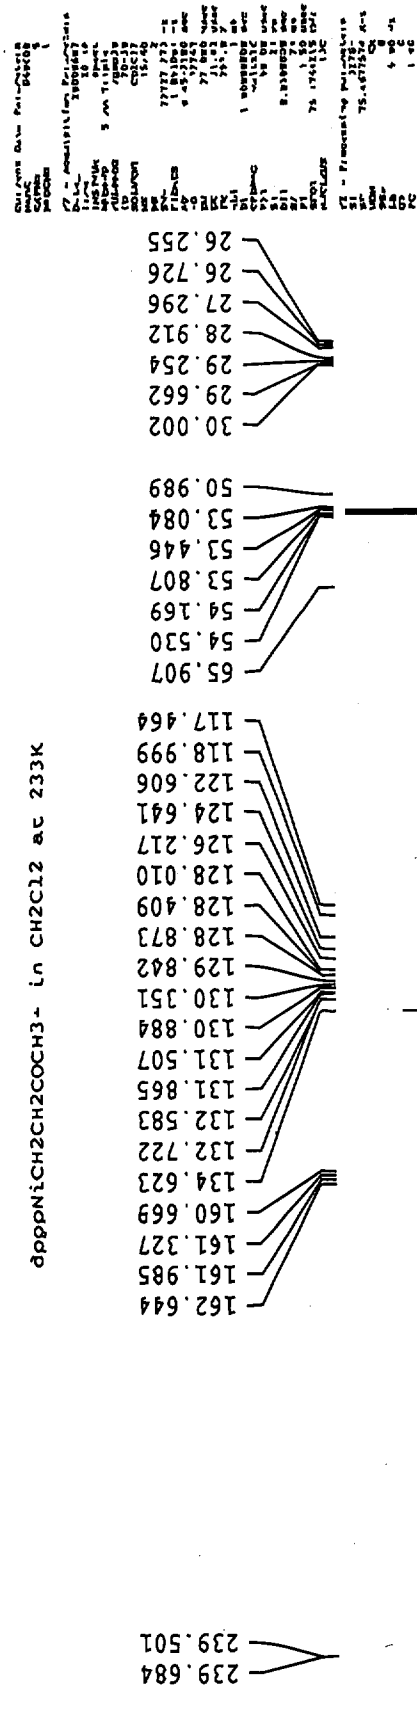

Supplement: Supplementary file 1 [file 5871684]
